# Supplementary material
Source: Springer Nature journal article supplement (https://www.springermedizin.de/resource/supplementary/12876_2011_690_MOESM1_ESM.pdf/9437452)
Supplement: MOESM1 [file 9437452]

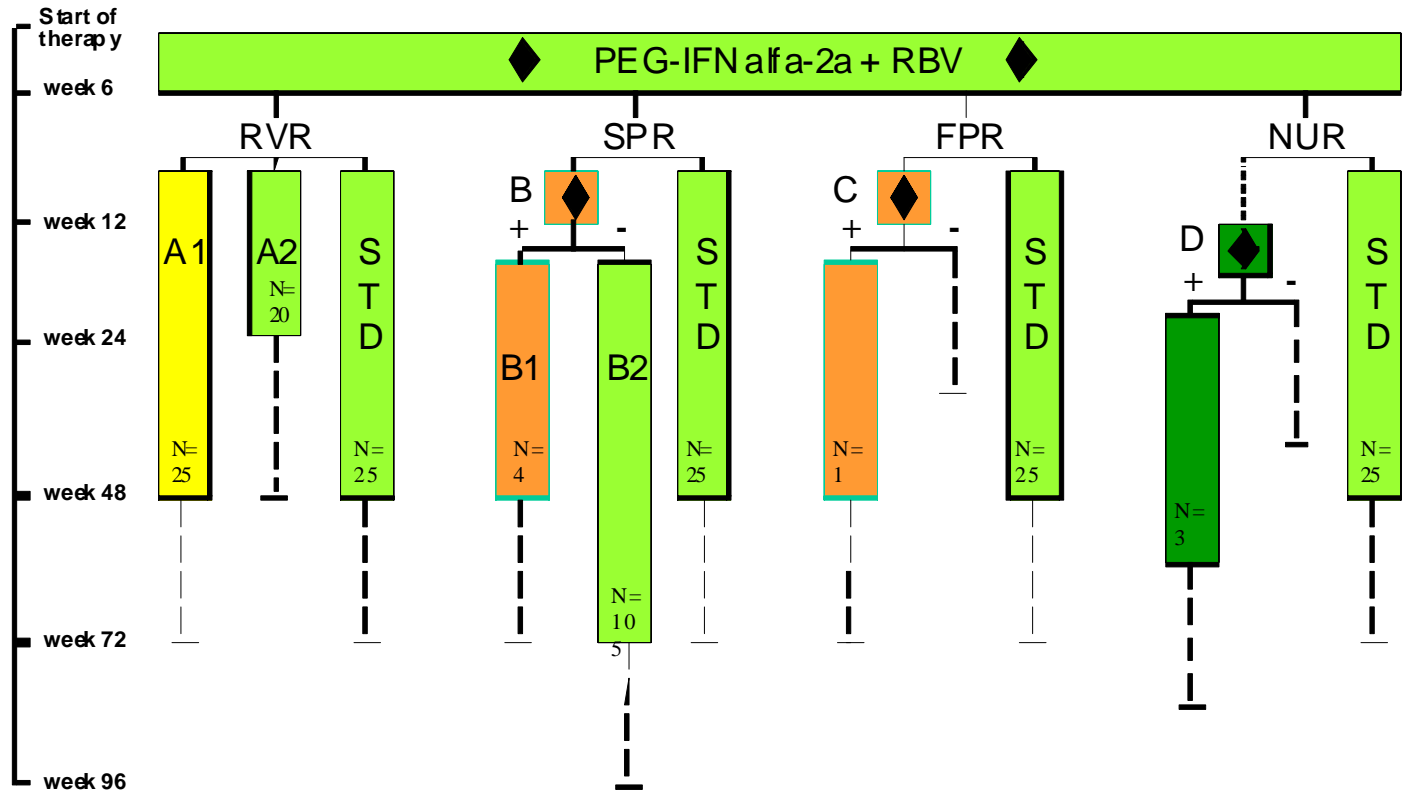

◆ Assessment of viral kinetics

■ PEG-IFN alfa-2a 180 µg qw

■ PEG-IFN alfa-2a 180 µg qw + RBV 1.0-1.2 g qd

■ PEG-IFN alfa-2a 180 µg qw + RBV 1.0-1.2 g qd + histamine

■ PEG-IFN alfa-2a 360 µg qw + RBV 1.0-1.2 g qd

— treatment

- - - follow-up

⋯ treatment interruption

+ acceleration of viral decay

- unaffected viral decay
